# Supplementary material for: Estimating historical disease burden and the impact of vaccination by influenza type and subtype in the United States, 2016-2020
Source: bioRxiv or medRxiv preprint supplement (doi:10.1101/2024.10.25.24316040), 2024-11-04
Supplement: Supplementary file [file media-1.pdf]

# Estimating historical disease burden and the impact of vaccination for influenza types and subtypes in the United States, 2016–2020

## Supplementary Information

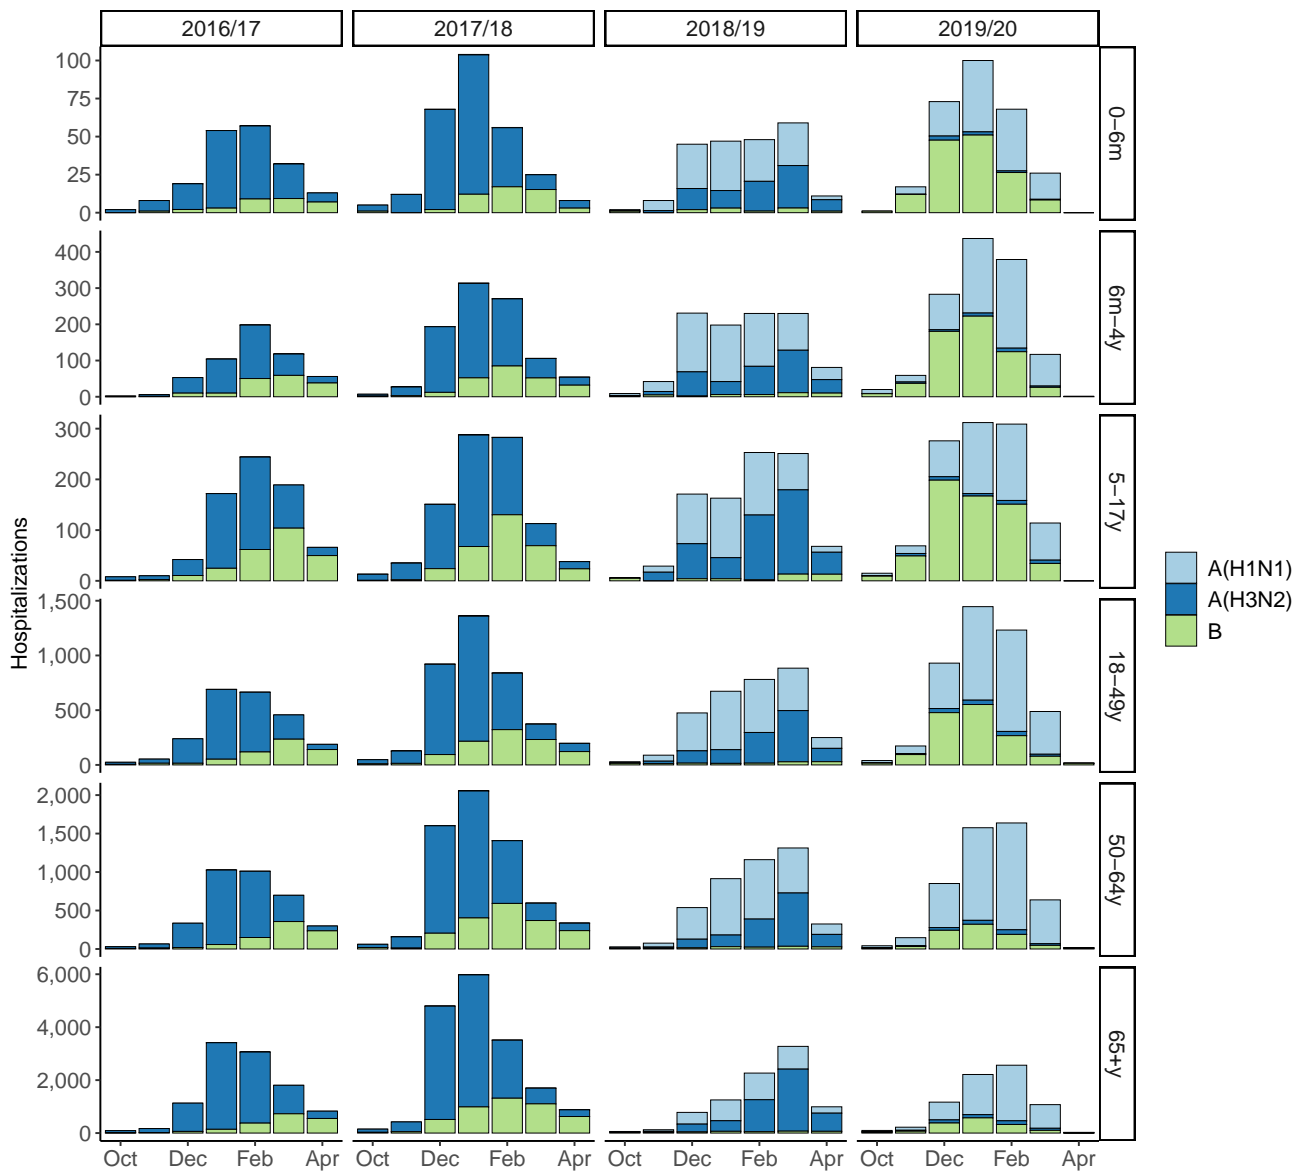

Figure S1 – Monthly reported FluSurv-NET hospitalizations by age and virus type or subtype.

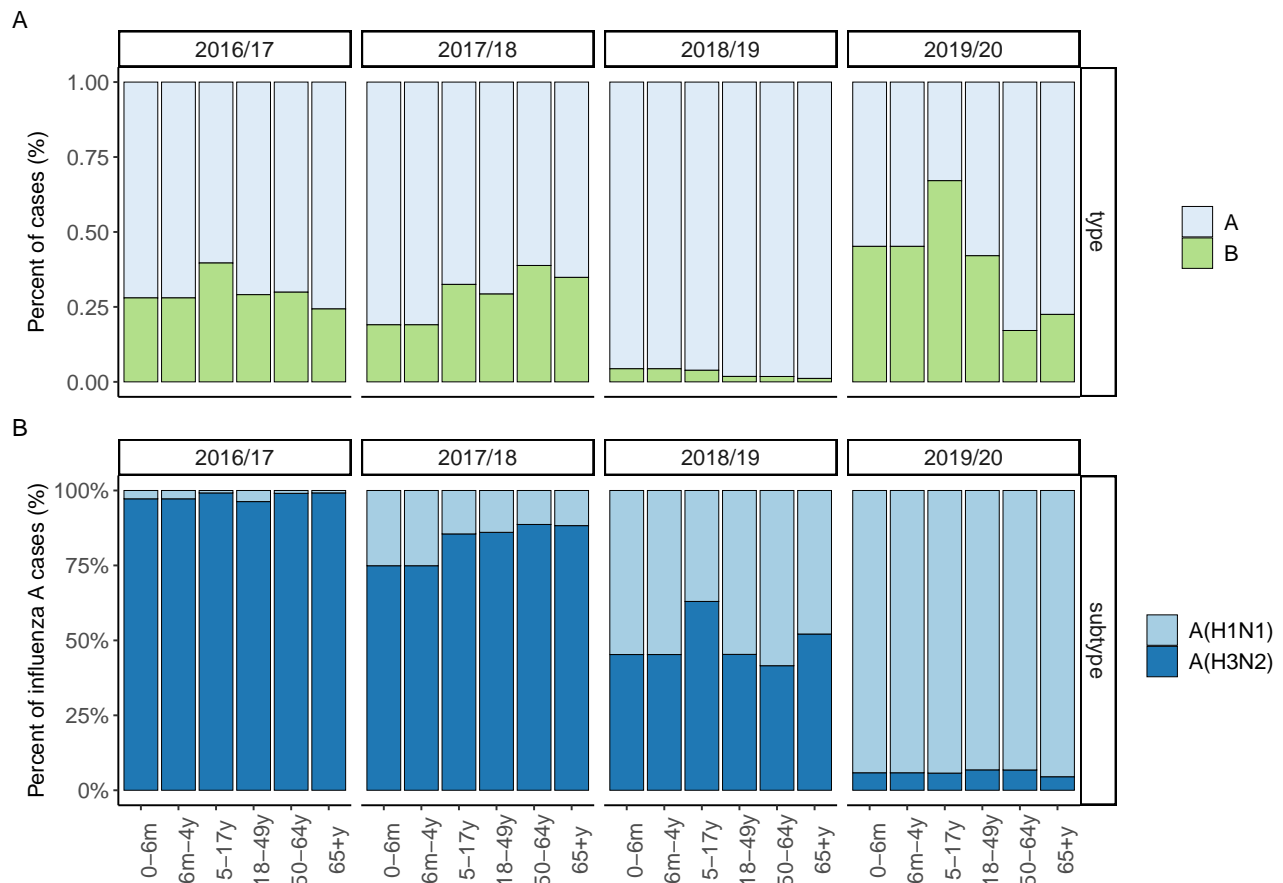

**Figure S2 – Distribution of virus type and subtypes among Flu VE Network cases.** (A) Distribution of influenza types A and B. (B) Distribution of influenza A subtypes, A(H1N1) and A(H3N2).

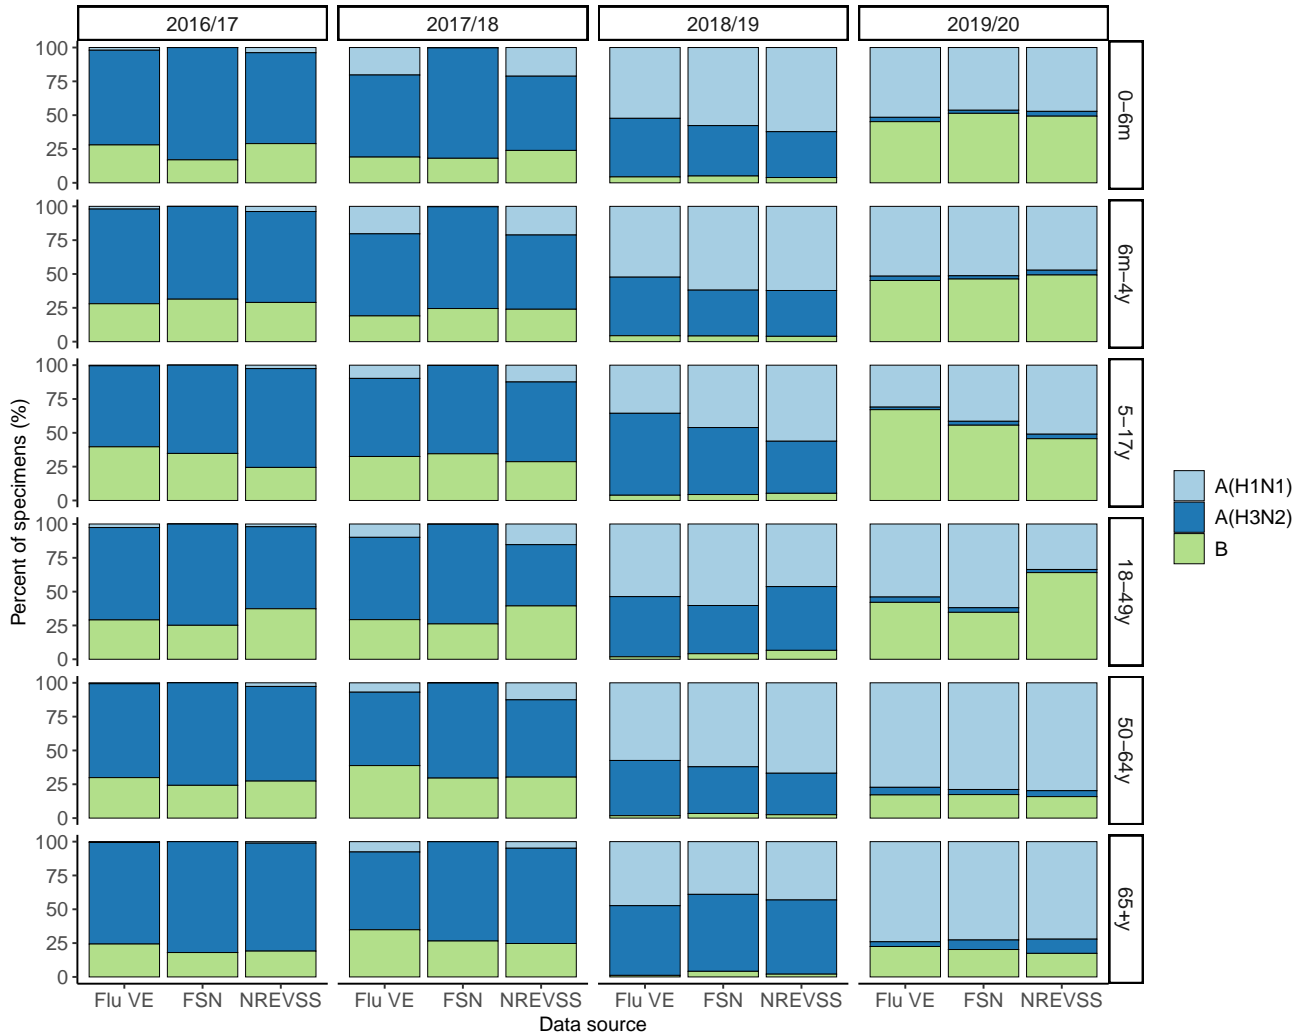

**Figure S3 – Comparison of the distribution of virus type and subtypes among independent data sources.** Flu VE refers to the Flu VE Network; FSN refers to FluSurv-NET; and NREVSS refers to the World Health Organization (WHO) and National Respiratory and Enteric Virus Surveillance System (NREVSS) Collaborating Labs. The NREVSS data were available for five age groups: 0–4 years, 5–17 years, 18–49 years, 50–64 years, and  $\geq 65$  years. NREVSS distributions among children 0–4 years were compared to FSN and Flu VE distributions among children 0–6 months and among 6 months–4 years.

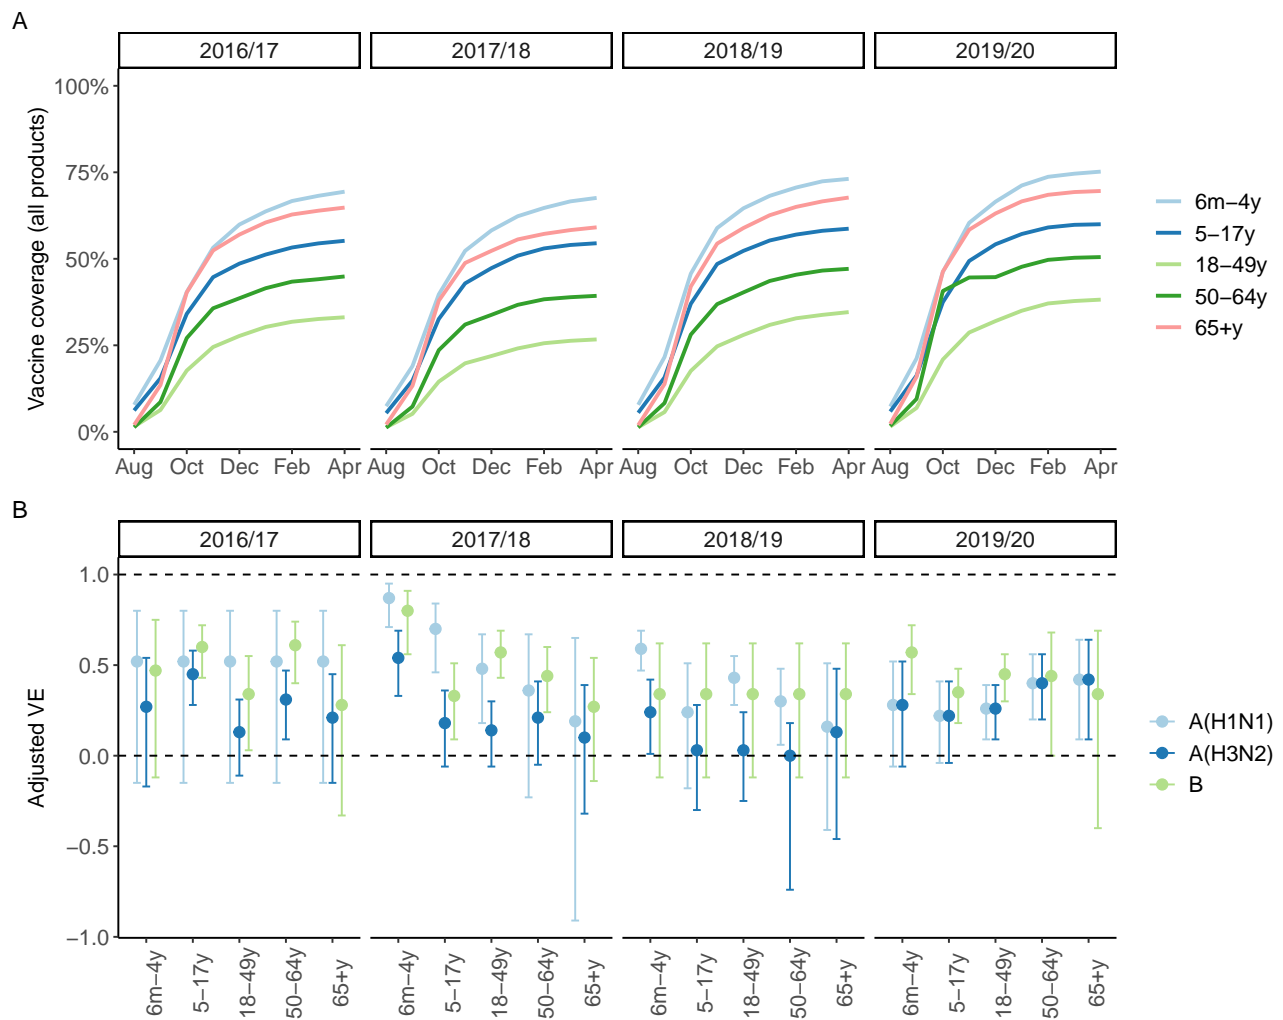

**Figure S4 – Vaccine coverage and vaccine effectiveness (VE).** (A) Monthly vaccine coverage estimates from FluVaxView. (B) VE estimates from the Flu VE Network.

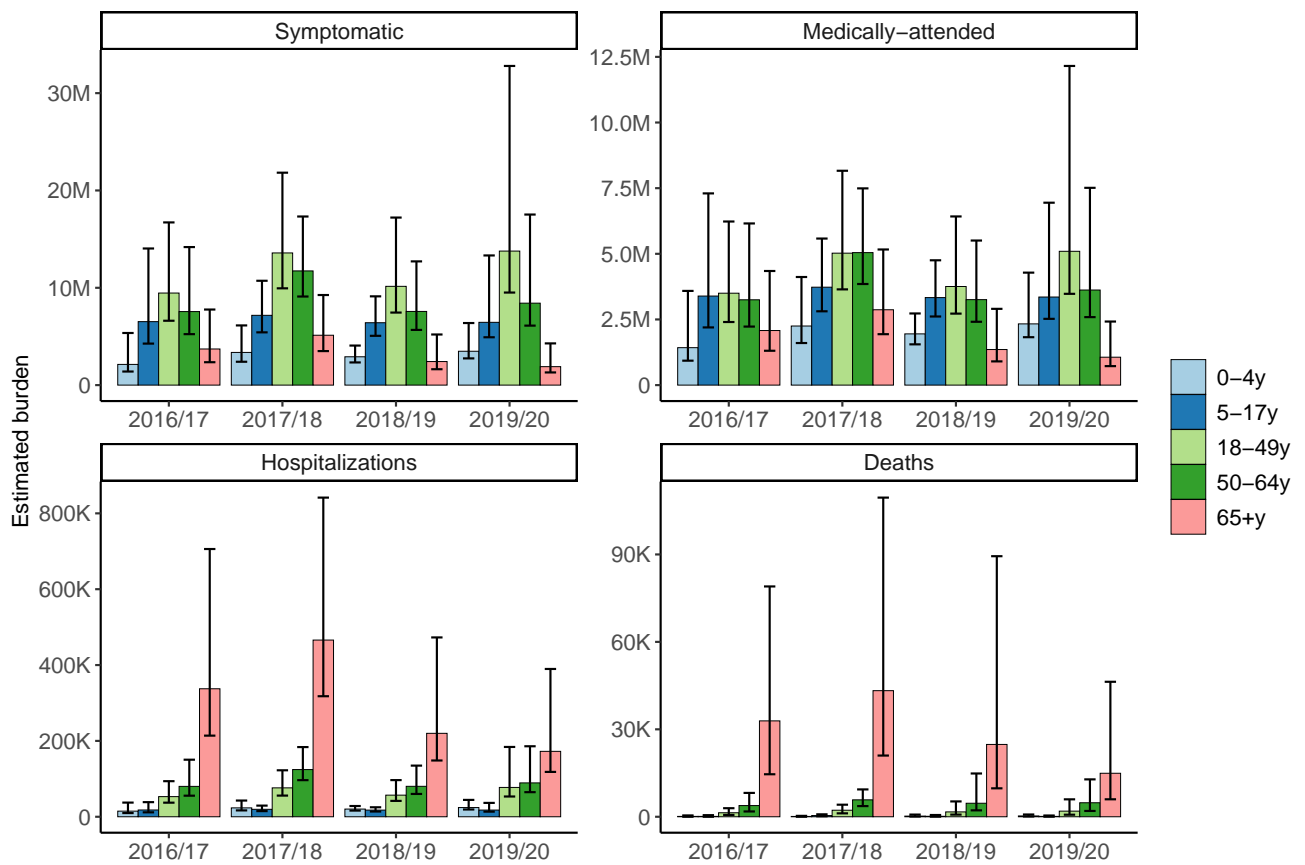

**Figure S5 – Estimated disease burden by season and age group for all influenza viruses.** Bars represent point estimates and error bars are the 95th percentile uncertainty intervals.

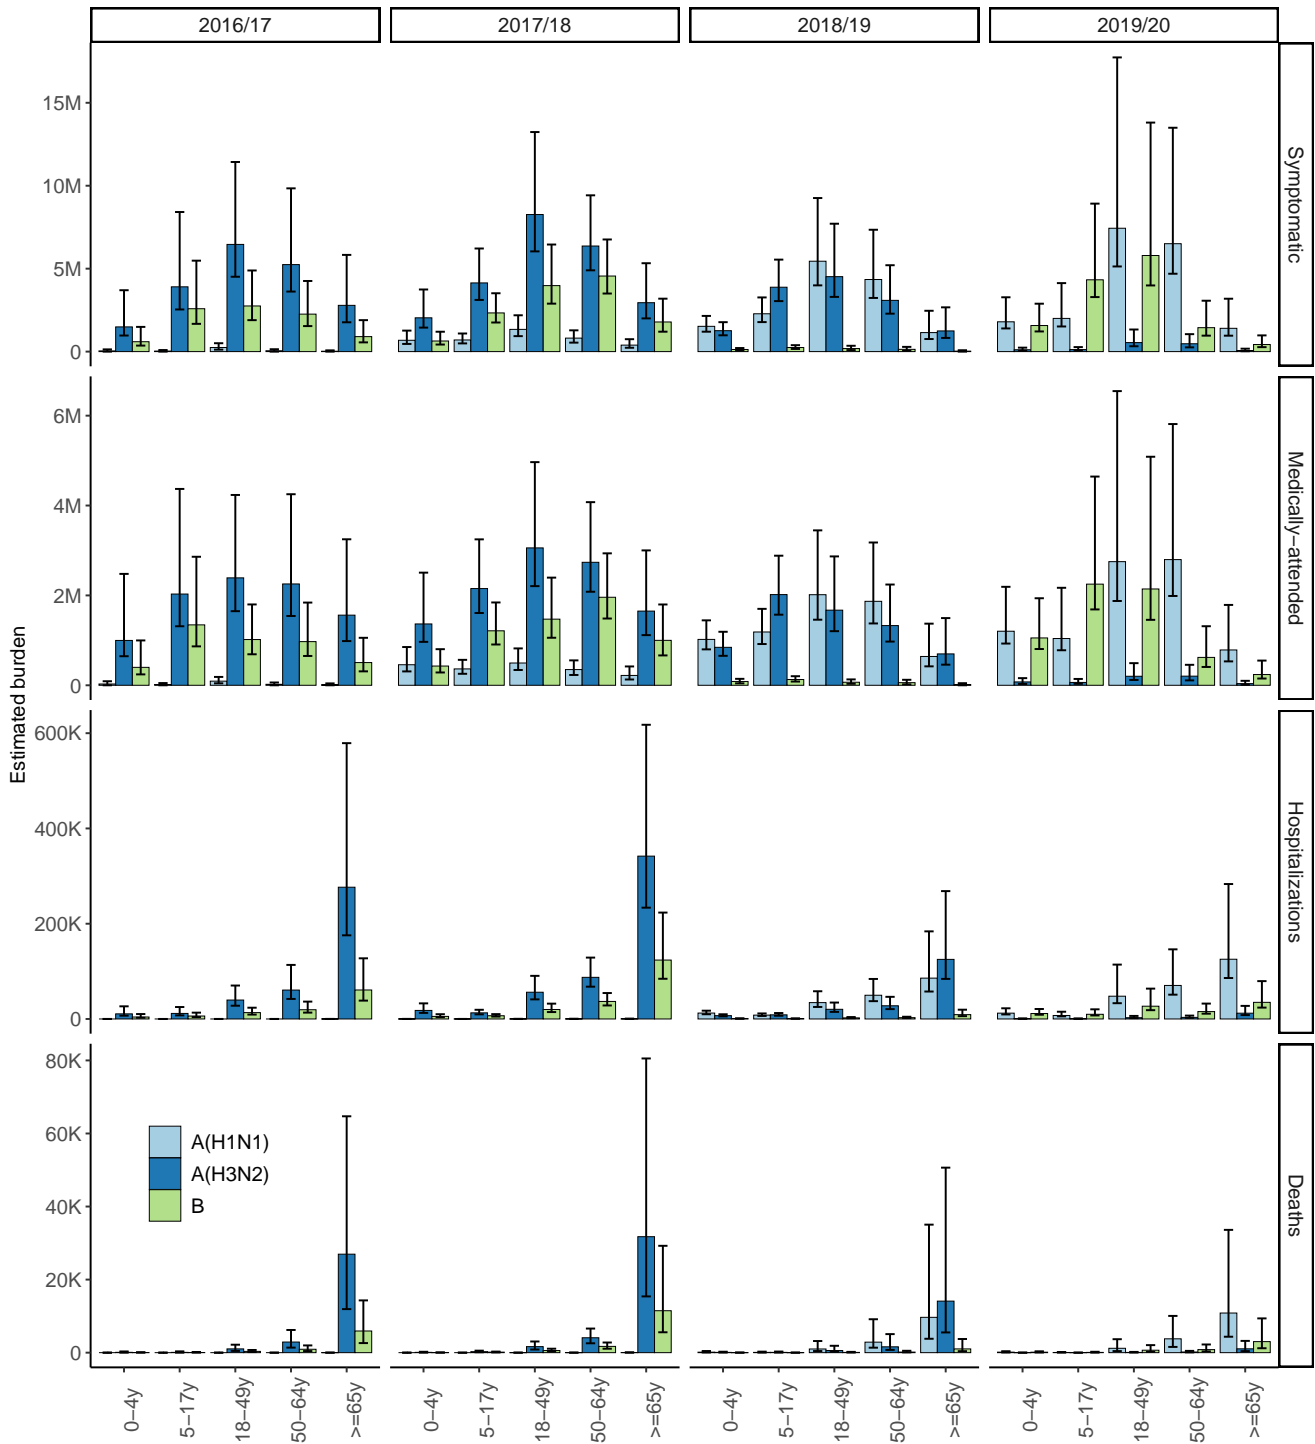

**Figure S6 – Estimated disease burden by season, age group, and virus type or subtype.** Bars represent point estimates and error bars are the 95th percentile uncertainty intervals.

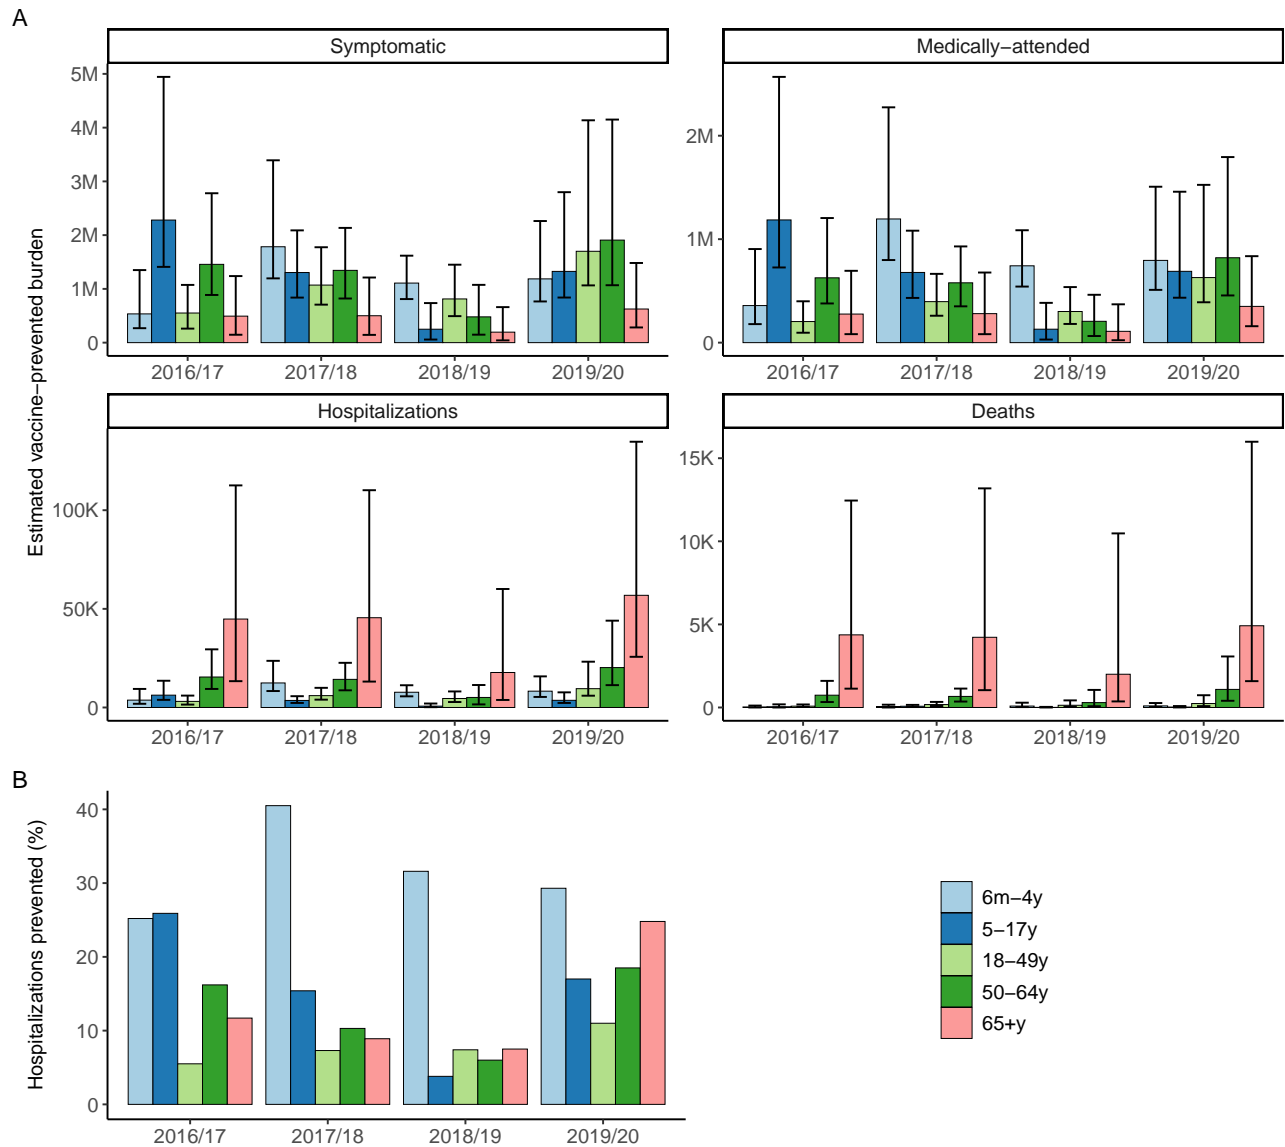

**Figure S7 – Estimated vaccine-prevented burden by season and age group for all influenza viruses. (A) Absolute disease burden prevented by vaccination. Bars represent point estimates and error bars are the 95th percentile uncertainty intervals. (B) Hospitalizations prevented as a percentage of the total number of hospitalizations estimated to occur in the absence of vaccination.**

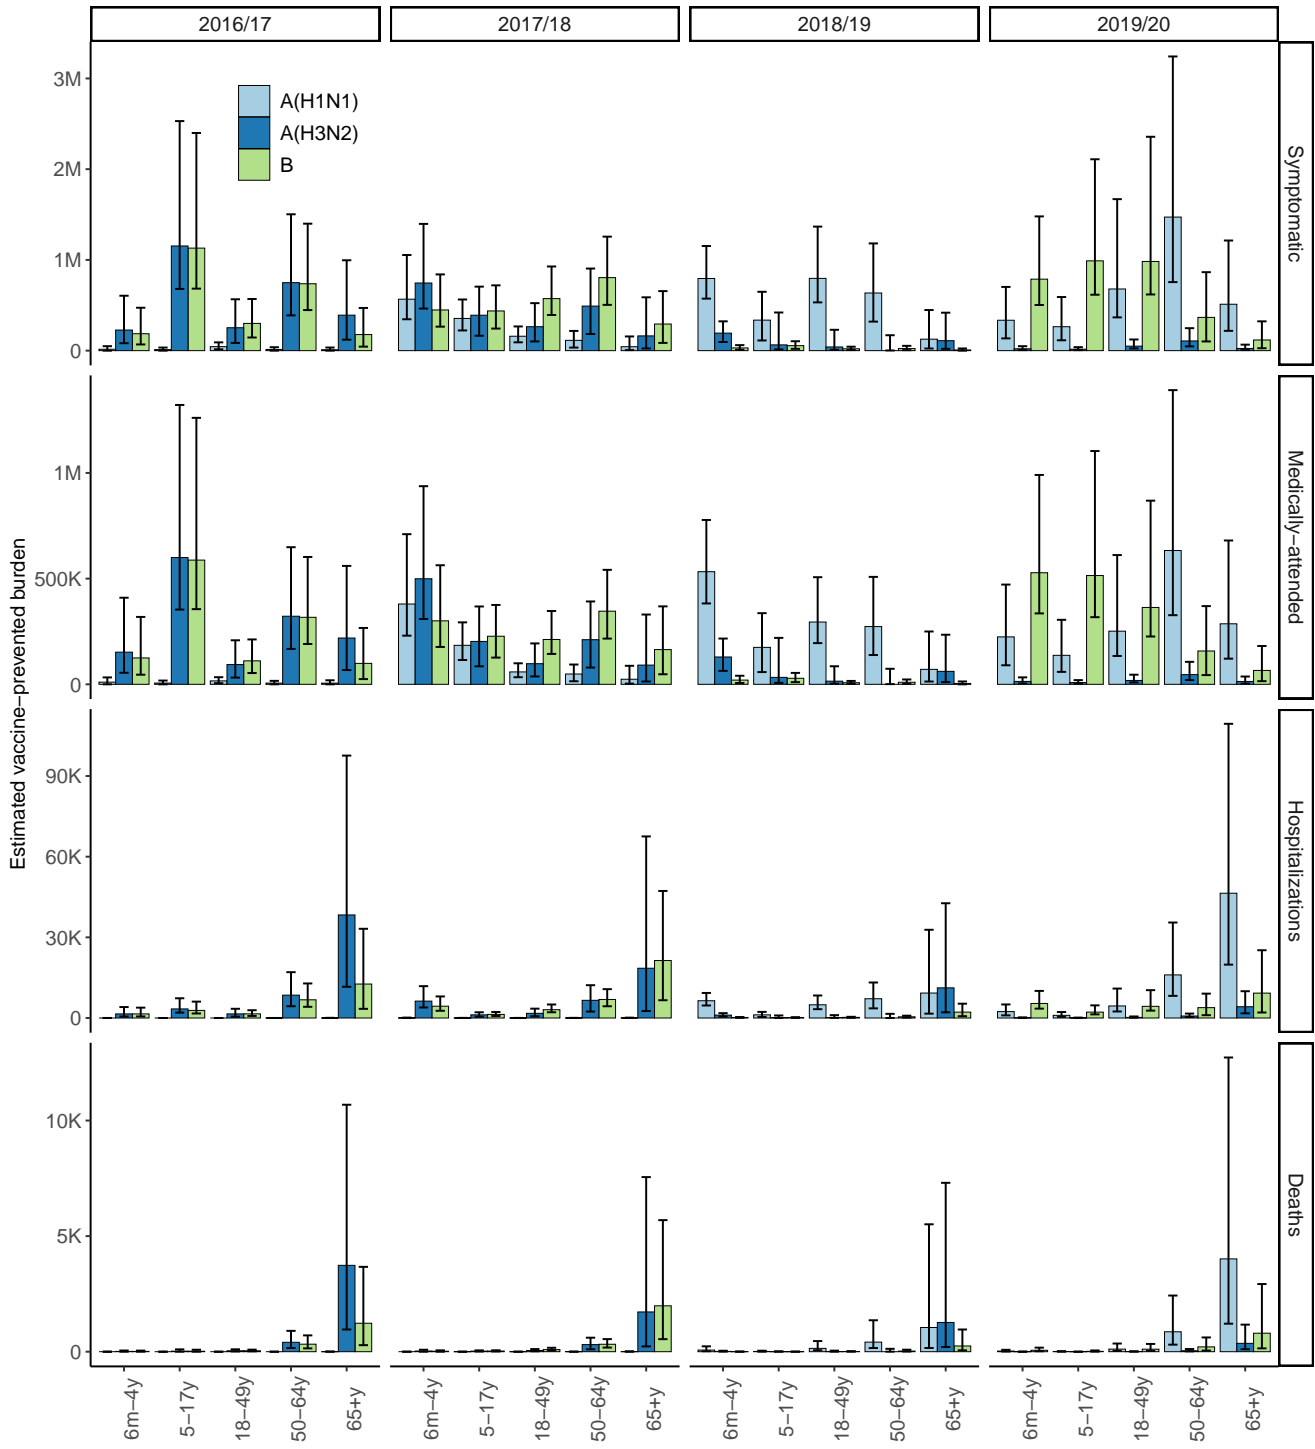

**Figure S8 – Estimated vaccine-prevented burden by season, age group, and virus type or subtype.** Bars represent point estimates and error bars are the 95th percentile uncertainty intervals.



**Table S1** – Summary values from select data sources. Values represent ranges for all influenza viruses from 2016/17–2019/20. Sources are cited in the text. Abbreviations: FSN = FluSurvNET.

| Age (years) | FSN total reported hospitalizations | Final vaccine coverage (%) | Vaccine effectiveness |
|-------------|-------------------------------------|----------------------------|-----------------------|
| 0-6m        | 185 - 285                           |                            |                       |
| 6m-4y       | 537 - 1296                          | 67.6 - 75.2                | 0.4 - 0.68            |
| 5-17y       | 731 - 1095                          | 54.5 - 60                  | 0.07 - 0.51           |
| 18-49y      | 2316 - 4326                         | 26.7 - 38.2                | 0.19 - 0.34           |
| 50-64y      | 3463 - 6222                         | 39.3 - 50.5                | 0.14 - 0.4            |
| 65+y        | 7366 - 17433                        | 59.1 - 69.6                | 0.12 - 0.39           |

**Table S2** – Seasonal distribution of virus types and subtypes among all outpatient cases (from the Flu VE Network) and all hospitalizations (from FluSurv-NET).

| Season  | Source           | A(H1N1) (%)   | A(H3N2) (%)   | B (%)         |
|---------|------------------|---------------|---------------|---------------|
| 2016/17 | Hospitalizations | 0.01 - 0.05   | 65.23 - 82.98 | 16.97 - 34.76 |
| 2016/17 | Outpatient cases | 0.49 - 2.63   | 59.87 - 75.08 | 24.32 - 39.64 |
| 2017/18 | Hospitalizations | 0.07 - 0.3    | 65.3 - 81.6   | 18.13 - 34.5  |
| 2017/18 | Outpatient cases | 6.93 - 20.32  | 54.25 - 60.84 | 19.03 - 38.82 |
| 2018/19 | Hospitalizations | 38.98 - 62.06 | 33.9 - 56.88  | 3.42 - 5.04   |
| 2018/19 | Outpatient cases | 35.58 - 57.4  | 40.81 - 60.56 | 1.15 - 4.36   |
| 2019/20 | Hospitalizations | 41.49 - 78.84 | 2.29 - 7.04   | 17.38 - 55.62 |
| 2019/20 | Outpatient cases | 31.01 - 77.25 | 1.89 - 5.62   | 17.13 - 67.1  |

**Table S3** – Input parameters that remain constant by month and by virus type and subtype. For parameters that vary by season, the range of inputs for 2016/17–2019/20 is shown. Sources for these values are cited in the text. Abbreviations: CHR = case-hospitalization ratio; DHR = death-hospitalization ratio; MA = medically-attended fraction.

| Age (years) | Under-detection multiplier | DHR         | CHR   | MA    |
|-------------|----------------------------|-------------|-------|-------|
| 0–4         | 1.357–1.804                | 0.005–0.012 | 143.4 | 0.670 |
| 5–17        | 1.418–2.121                | 0.007–0.021 | 364.7 | 0.520 |
| 18–49       | 1.680–2.104                | 0.025–0.029 | 178.2 | 0.370 |
| 50–64       | 1.586–1.988                | 0.047–0.058 | 94.3  | 0.430 |
| ≥65         | 1.852–2.470                | 0.087–0.113 | 11.0  | 0.560 |

**Table S4 – Monte Carlo simulation settings.** Parameter notation is as follows:  $\lambda$  reflects the mean of a Poisson distribution;  $N$  and  $p$  reflect the number of trials and probability of success of a Binomial distribution;  $\mu$  and  $\sigma$  reflect the mean and standard deviation of a Normal distribution; and  $m$ ,  $m_l$  and  $m_u$  reflect the mode, minimum and maximum of a Beta-PERT distribution. Normal distributions were truncated at 0. Abbreviations: VE = vaccine effectiveness.

| Input                                                                                                                    | Stratifications                                               | Distribution                           | Parameter(s)                                                                                                                                                                                                                                                                                                                 |
|--------------------------------------------------------------------------------------------------------------------------|---------------------------------------------------------------|----------------------------------------|------------------------------------------------------------------------------------------------------------------------------------------------------------------------------------------------------------------------------------------------------------------------------------------------------------------------------|
| Number of FluSurv-NET hospitalizations*<br>A(H1N1)<br>A(H3N2)<br>B                                                       | Season, month, age                                            | Poisson<br>Poisson<br>Poisson          | $\lambda$ = observed number<br>$\lambda$ = observed number<br>$\lambda$ = observed number                                                                                                                                                                                                                                    |
| Number of Flu VE Network outpatient visits*<br>A(H1N1)<br>A(H3N2)<br>B                                                   | Season, month, age                                            | Binomial<br>Binomial<br>Binomial       | $N$ = observed number of influenza A visits<br>$p$ = observed proportion of A visits that were A(H1N1)<br>$N$ = observed number of influenza A visits<br>$p$ = observed proportion of A visits that were A(H3N2)<br>$N$ = observed total number of influenza visits<br>$p$ = observed proportion of total visits that were B |
| Multipliers<br>Under-detection of hospitalizations<br><br>Medically-attended fraction<br><br>Death-hospitalization ratio | Season, age<br><br>Season, age<br><br>Season, age             | Beta-PERT<br><br>Normal<br><br>See [1] | $m$ = observed value<br>$m_l$ = observed lower 95th percentile<br>$m_u$ = observed upper 95th percentile<br>$\mu$ = observed fraction<br>$\sigma$ = observed standard error                                                                                                                                                  |
| Vaccination<br>Coverage<br><br>logarithm of 1 - VE                                                                       | Season, month, age<br><br>Season, month, age,<br>type/subtype | Normal<br><br>Normal                   | $\mu$ = observed fraction<br>$\sigma$ = observed standard error<br>$\mu$ = observed $\log(1 - VE)$<br>$\sigma$ = observed standard error of $\log(1 - VE)$                                                                                                                                                                   |

\*Total hospitalizations (or outpatient visits) were calculated as the sum of simulated hospitalizations (or outpatient visits) for A(H1N1) + A(H3N2) + B.

## 1 References

[1] Rolfes, M. A. et al. Effects of Influenza Vaccination in the United States During the 2017–2018 Influenza Season. *Clin. Infect. Dis.* 69, 1845–1853 (2019).
